# Supplementary material
Source: PubMed Central journal article supplement (PMC2670170)

Cummings et al. Figure S1

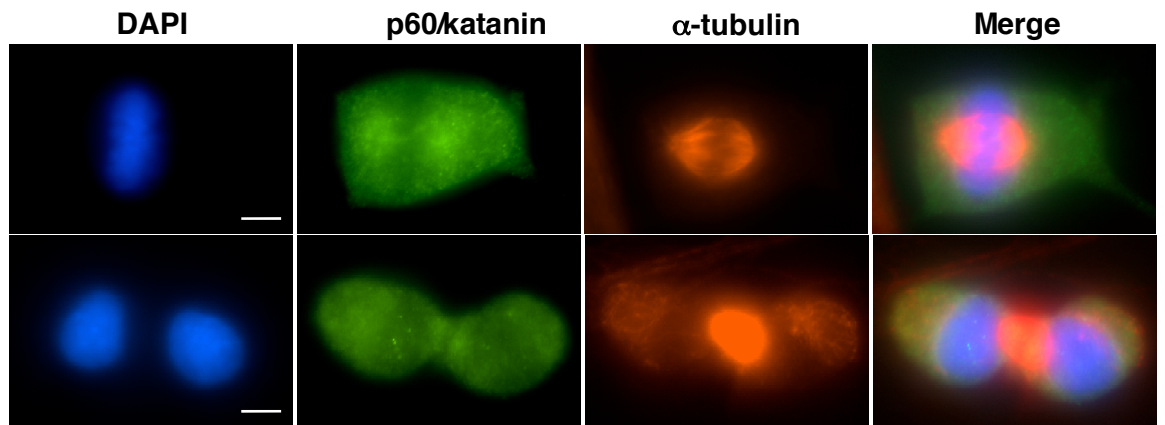

Cummings et al. Figure S2

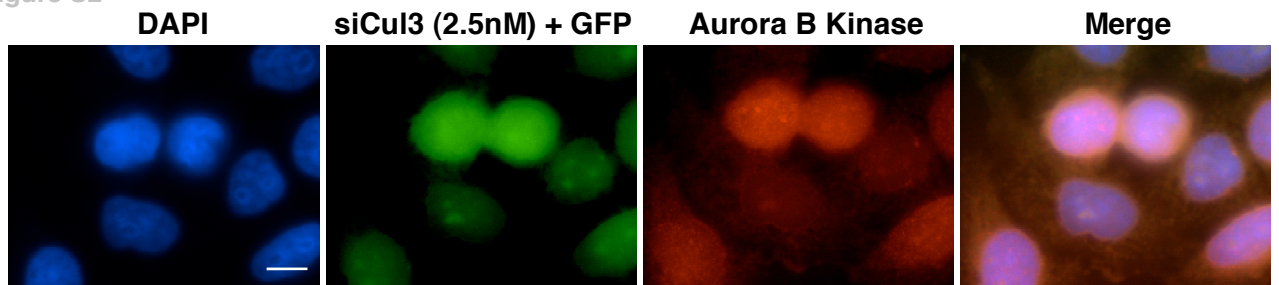

Cummings et al. Figure S3

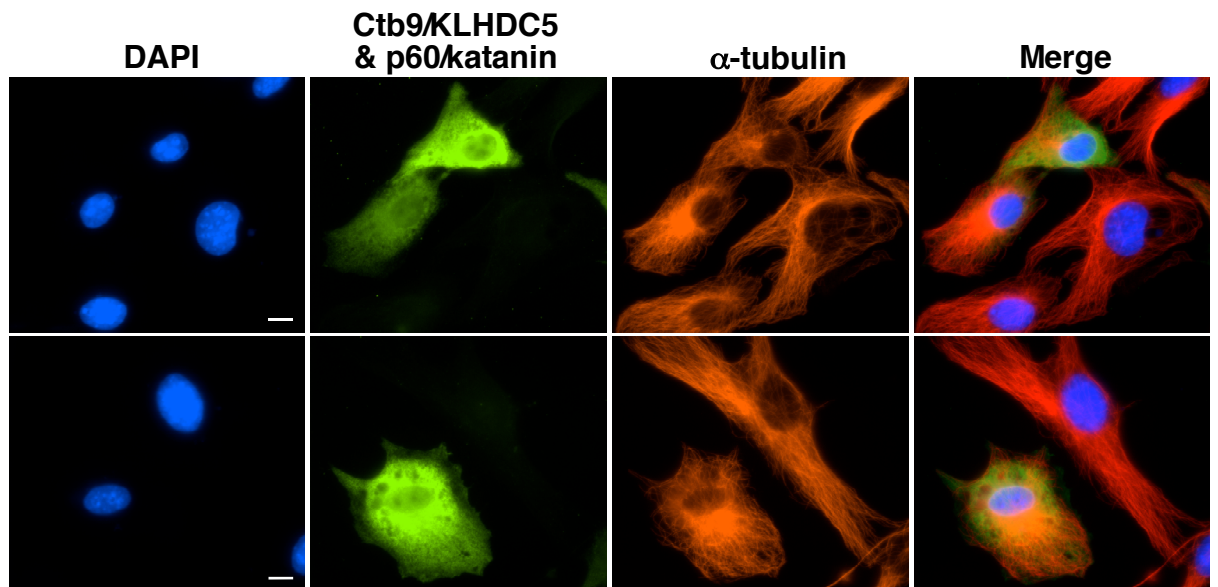

Supplement: M809374200_2.pdf [file M809374200_2.pdf]

Cummings et al. Figure S4

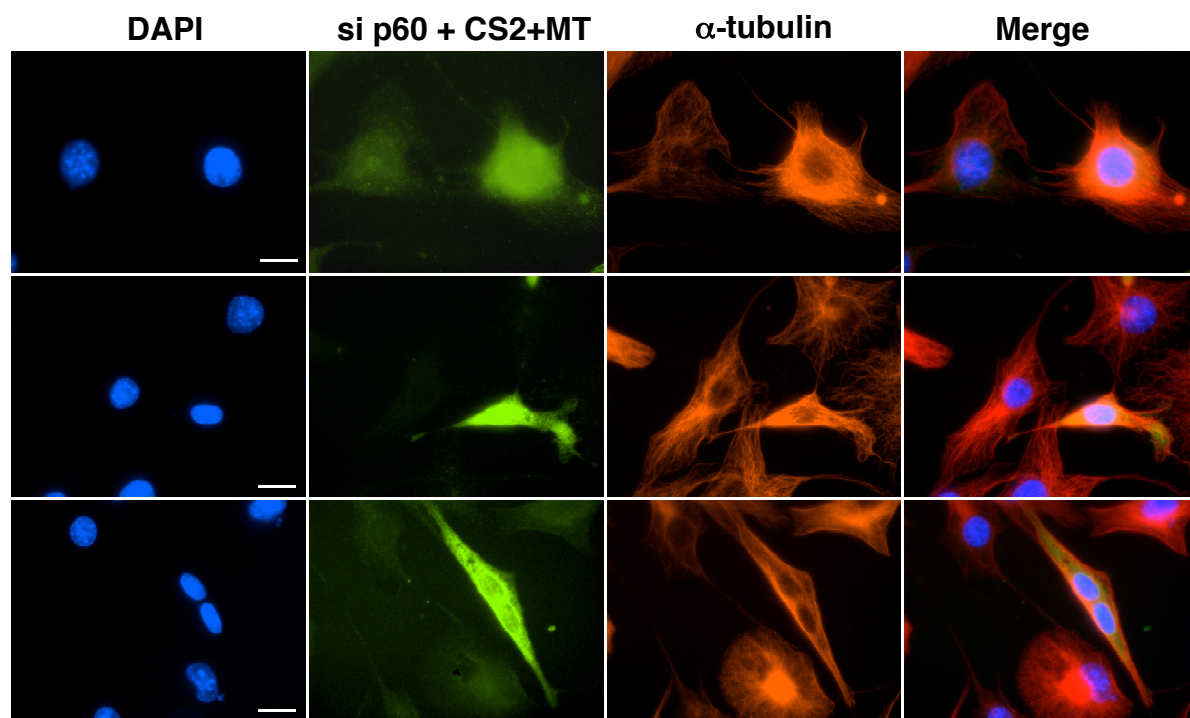

Cummings et al. Figure S5

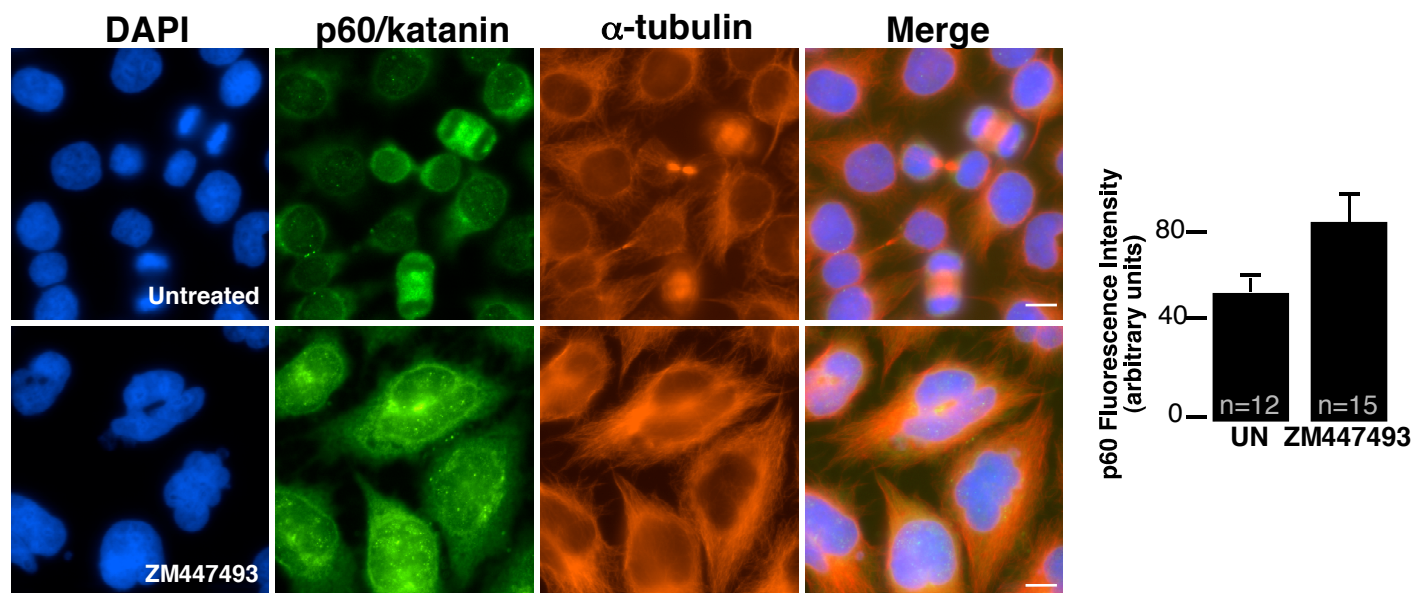

Supplement: M809374200_3.pdf [file M809374200_3.pdf]
